# Supplementary material for: Midbrain dopaminergic inputs gate amygdala intercalated cell clusters by distinct and cooperative mechanisms in male mice
Source: eLife. 2021 May 24;10:e63708. doi: 10.7554/eLife.63708 (PMC8143799; doi:10.7554/eLife.63708)
Supplement: Figure 1—figure supplement 1—source data 1. [file elife-63708-fig1-figsupp1-data1.xlsx]

## Sheet: Tabelle2
Source Data for Figure1-figure supplement 1C
Animal ID	Hemisphere	% GFP+TH+/GFP+ cells
Mouse 1	Left	91.133
Mouse 1	Left	95
Mouse 1	Left	90.7104
Mouse 2	Left	94.8454
Mouse 2	Left	82.1918
Mouse 2	Left	86.5031
Mouse 3	Left	81.8841
Mouse 3	Left	97.4684
Mouse 4	Left	92.1053
Mouse 4	Left	93.617
Mouse 5	Left	96.3855
Mouse 5	Left	91.3978
Mouse 1	Right	87.4286
Mouse 1	Right	96.9697
Mouse 2	Right	78.3784
Mouse 2	Right	90
Mouse 3	Right	93.8462
Mouse 3	Right	98.5075
Mouse 4	Right	95.6897
Mouse 4	Right	100
Mouse 5	Right	94.3396
Mouse 5	Right	77.3585
