# Supplementary material for: Midbrain dopaminergic inputs gate amygdala intercalated cell clusters by distinct and cooperative mechanisms in male mice
Source: eLife. 2021 May 24;10:e63708. doi: 10.7554/eLife.63708 (PMC8143799; doi:10.7554/eLife.63708)
Supplement: Figure 1—figure supplement 4—source data 1. [file elife-63708-fig1-figsupp4-data1.xlsx]

## Sheet: Sheet1
Source Data for Figure1-figure supplement 4C
						Background				Reference Area (CeLc)
Animal	Bregma	section	region	mean gray value	Min-Max Range	mean gray value	Min-Max Range	MGV normalized for BKG		mean gray value	Min-Max Range	Max MGV normalized for BKG	% of Max	Values for analysis
6970	-1.7	66-R	dm	183818	123_255	190788	117_228	6970		175154	121_248	15634	44.5823	44.5823
		66-R	vm	187124	130_241	190788		3664		175154		15634	23.4361	23.4361
	-1.94	70-L	dm	209610	150_255	219598	150_255	9988		185905	121_255	33693	29.6441	29.6441
		70-L	vm	216000	148_255	219598		3598		185905		33693	10.6788	10.6788
6069	-1.46	58-R	dm	177766	95_255	211035	128_255	33269		170767	75_255	40268	82.619	68.9812
		58-R	vm	205927	141_255	211035		5108		170767		40268	12.685	43.4192
	-1.46	62-R	dm	175843	97_255	202100	134_244	26257		154863	69_249	47237	55.5857
		62-R	vm	192470	124_253	202100		9630		154863		47237	20.3866
	-1.7	54-L	dm	189307	131_240	217888	149_255	28581		166245	88_255	51643	55.3434	70.716
		54-L	vm	199046	141_240	217888		18842		166245		51643	36.4851	28.2635
	-1.7	58-L	dm	174723	95_255	212085		37362		168563	84_255	43522	85.8462
		58-L	vm	196356	101_255	212085		15729		168563		43522	36.1403
	-1.94	62-L	dm	207784	118_255	229087	151_255	21303		184849	80_255	44238	48.1554	48.1554
		62-L	vm	218500	151_255	229087		10587		184849		44238	23.9319	23.9319
525	-1.7	47-L	dm	73387	23_173	138429	48_208	65042		70314	15_178	68115	95.4885	82.701
		47-L	vm	101275	35_196	138429		37154		70314		68115	54.546	53.8263
	-1.94	52-L	dm	113080	49_179	151611	53_238	38531		78204	21_186	73407	52.4895	52.4895
		52-L	vm	112185	39_186	151611		39426				151611	26.0047	26.0047
	-1.46	47-R	dm	77782	25_181	145546	47_212	67764		71177	19_155	74369	91.1186	91.1186
		47-R	vm	105511	34_175	145546		40035		71177		74369	53.8329	53.8329
	-1.7	52-R	dm	92072	36_196	148853	64_235	56781		67637	12_160	81216	69.9136
		52-R	vm	105722	36_170	148853		43131		67637		81216	53.1065
524	-1.94	3R	dm	167453	105_224	226852	157_255	59399		157849	0_231	69003	86.0818	68.2487
			vm	181543	100_225	226852		45309		157849		69003	65.6624	57.6468
	-1.94	3L	dm	161953	78_255	204893	105_245	42940		119721	32_253	85172	50.4156
			vm	162621	50_233	204893		42272		119721		85172	49.6313
	-1.7	2R	dm	162113	75_229	230315		68202		132348		97967	69.6173	61.1237
			vm	175349	98_246	230315	136_255	54966		132348	41_255	97967	56.1066	48.3717
	-1.7	2L	dm	159922	93_215	210620		50698		114291		96329	52.63
			vm	171475	101_236	210620	129_255	39145		114291	29_255	96329	40.6368
526	-1.94	2R	dm	187303	82_248	250934	166_255	63631		135190	38_246	115744	54.9756	52.3691
			vm	175929	60_226	250934		75005		135190		115744	64.8025	61.073
	-1.94	2L	dm	170941	66_248	227026	95_255	56085		114321	20_238	112705	49.7627
			vm	162397	57_226	227026		64629		114321		112705	57.3435
	-1.7	1R	dm	148547	59_255	218966	134_251	70419		108955	14_255	110011	64.0109	64.0109
			vm	169452	56_232	218966		49514		108955		110011	45.0082	45.0082
7275	-1.46	1L	dm	146729	38_255	217863	110_255	71134		108281	21_255	109582	64.9139	82.9033
			vm	168116	39_255	217863		49747		108281		109582	45.3971	53.9671
	-1.46	1R	dm	110782	24_255	206515	84_255	95733		111629	13_255	94886	100.893
			vm	147176	31_255	206515		59339		111629		94886	62.5371
	-1.7	2L	dm	153266	34_255	215582	145_255	62316		111099	17_255	104483	59.6422	59.2965
			vm	172751	32_255	215582		42831		111099		104483	40.9933	44.1966
	-1.7	2R	dm	142434	32_255	205341	79_255	62907		98630	14_255	106711	58.9508
			vm	154760	46_255	205341		50581		98630		106711	47.4
	-1.94	3R	dm	160489	31_255	204311	89_255	43822		120735	15_255	83576	52.4337	52.4337
			vm	167064	38_255	204311		37247		120735		83576	44.5666	44.5666
7276	-1.46	1L	dm	158736	46_255	219139	100_255	60403		142133	46_255	77006	78.4393	78.4393
			vm	180364	63_255	219139		38775		142133		77006	50.3532	50.3532
	-1.7	2L	dm	169682	58_255	223410	161_255	53728		138514	57_255	84896	63.2868	55.1669
			vm	184941	75_255	223410		38469		138514		84896	45.3131	38.7084
	-1.7	3L	dm	173148	35_255	213806	126_255	40658		127386	27_255	86420	47.047
			vm	186062	58_255	213806		27744		127386		86420	32.1037
	-1.94	3R	dm	179294	46_255	227118	148_255	47824		121557	25_255	105561	45.3046	45.3046
			vm	179122	67_255	227118		47996		121557		105561	45.4675	45.4675
7277	-1.7	2L	dm	179148	47_255	232236	87_255	53088		130277	24_255	101959	52.068	52.068
			vm	188181	67_255	232236		44055		130277		101959	43.2085	43.2085
	-1.46	2R	dm	129375	25_255	237886	121_255	108511		122209	27_255	115677	93.8052	95.3367
			vm	184516	56_255	237886		53370		122209		115677	46.1371	41.3987
	-1.46	3L	dm	134396	40_255	230933	112_255	96537		131275	31_255	99658	96.8683
			vm	194398	75_255	230933		36535		131275		99658	36.6604
7279	-1.7	1L	dm	164803	50_255	226868	101_255	62065		110963	25_255	115905	53.5482	53.5482
			vm	166040	35_255	226868		60828		110963		115905	52.4809	52.4809
	-1.46	1R	dm	137231	34_255	238428	107_255	101197		119634	18_255	118794	85.187	85.187
			vm	165198	35_255	238428		73230		119634		118794	61.6445	61.6445
	-1.94	2L	dm	183188	48_255	229555	113_255	46367		114315	21_255	115240	40.2352	40.2352
			vm	172982	56_255	229555		56573		114315		115240	49.0915	49.0915
