# Supplementary material for: Midbrain dopaminergic inputs gate amygdala intercalated cell clusters by distinct and cooperative mechanisms in male mice
Source: eLife. 2021 May 24;10:e63708. doi: 10.7554/eLife.63708 (PMC8143799; doi:10.7554/eLife.63708)
Supplement: Figure 1—source data 1. [file elife-63708-fig1-data1.xlsx]

## Sheet: Sheet1
Source Data for Figure 1D
	Animal #	ChR2+ axons volume	Total Volume	Ratio ChR2 Volume/Total volume	Ratio in %
dm-ITC
	139B	5016.31	108600	0.0461907	4.61907
	140B	6358.28	70305.3	0.0904381	9.04381
	MO254A1	10831.9	176130	0.0614995	6.14995
	M0255B1	11465.6	197554	0.0580378	5.80378
vm-ITC
	139B	4039.58	128984	0.0313185	3.13185
	140B	4103.99	177019	0.0231839	2.31839
	M0254A1	5095.12	153002	0.033301	3.3301
	M0255B1	3505.57	165455	0.0211875	2.11875
