# Supplementary material for: Midbrain dopaminergic inputs gate amygdala intercalated cell clusters by distinct and cooperative mechanisms in male mice
Source: eLife. 2021 May 24;10:e63708. doi: 10.7554/eLife.63708 (PMC8143799; doi:10.7554/eLife.63708)
Supplement: Figure 2—figure supplement 4—source data 1. [file elife-63708-fig2-figsupp4-data1.xlsx]

## Sheet: Sheet1
Source Data for Figure 2-figure supplement 4B
		EPSC amplitude (pA)
Animal ID	Cell ID (dm-ITC)	ACSF	TTX	TTX+4-AP
Mouse 1	Cell 1	33.4294	0.132928	20.1476
Mouse 1	Cell 2	38.76	3.81681	54.8044
Mouse 2	Cell 3	81.6085	2.87546	67.6017
Mouse 3	Cell 4	84.9399	3.19028	90.2184
