# Supplementary material for: Midbrain dopaminergic inputs gate amygdala intercalated cell clusters by distinct and cooperative mechanisms in male mice
Source: eLife. 2021 May 24;10:e63708. doi: 10.7554/eLife.63708 (PMC8143799; doi:10.7554/eLife.63708)
Supplement: Figure 2—source data 1. [file elife-63708-fig2-data1.xlsx]

## Sheet: Sheet1
Source Data for Figure 2C and Figure 2E-F
Animal ID	Cell ID (dm-ITC)	Erev (mV)	Corelease type	Latency (ms) -70mV	Latency (ms) 0mV
Mouse 1	Cell 1	-51.3334	GABA		5.2
Mouse 1	Cell 2	-48.3045	GABA		4.8
Mouse 1	Cell 3	-30.0821	Mixed	4	3.6
Mouse 1	Cell 4	-39.5245	Mixed	3.4	3.2
Mouse 2	Cell 5	0.852567	Glu	2.6
Mouse 3	Cell 6	-52.7268	GABA		4.2
Mouse 3	Cell 7	-44.404	GABA		2.4
Mouse 4	Cell 8	-62.0482	GABA		6
Mouse 4	Cell 9	-42.2743	GABA		3.4
Mouse 4	Cell 10	-43.4136	GABA		3.6
Mouse 5	Cell 11	-35.8732	Mixed	4	3.6
Mouse 6	Cell 12	-32.6222	Mixed	4.6	4.8
Mouse 7	Cell 13	-53.3147	GABA		4.6
Mouse 7	Cell 14	-6.34121	Glu	2.4
Mouse 8	Cell 15	-36.9728	Mixed	3.8	4.2
Mouse 9	Cell 16	-4.9756	Glu	2.8
Mouse 10	Cell 17	-19.8796	Mixed	2.4	3.8
Mouse 11	Cell 18	-43.5776	GABA		3.4
Mouse 11	Cell 19	-44.9394	GABA		7
Mouse 12	Cell 20	-53.1851	GABA		3.6
Mouse 13	Cell 21	-43.5123	GABA		3.3
Mouse 13	Cell 22	-26.7499	Mixed	3.8	3
Mouse 13	Cell 23	-28.5159	Mixed	3.2	3.6
Mouse 14	Cell 24	-24.8457	Mixed	2.8	3
Mouse 14	Cell 25	-20.0828	Mixed	2.4	3.6
Mouse 15	Cell 26	-42.9794	GABA		4.8
Mouse 16	Cell 27	-37.2248	Mixed	3.6	4
