# Supplementary material for: Midbrain dopaminergic inputs gate amygdala intercalated cell clusters by distinct and cooperative mechanisms in male mice
Source: eLife. 2021 May 24;10:e63708. doi: 10.7554/eLife.63708 (PMC8143799; doi:10.7554/eLife.63708)
Supplement: Figure 2—source data 2. [file elife-63708-fig2-data2.xlsx]

## Sheet: Sheet1
Source Data for Figure 2C and Figure 2H-I
Animal ID	Cell ID (vm-ITC)	Erev (mV)	Corelease type	Latency (ms) -70mV	Latency (ms) 0mV
Mouse 1	Cell 1	-33.6229	Mixed	5.2	5.2
Mouse 1	Cell 2	-36.682	Mixed	4	4.8
Mouse 2	Cell 3	-54.4231	GABA		2.8
Mouse 2	Cell 4	-37.2423	Mixed	3.4	2.8
Mouse 3	Cell 5	-35.7447	Mixed	3.8	4.1
Mouse 4	Cell 6	-42.7865	GABA		3.2
Mouse 5	Cell 7	-38.1612	Mixed	3.4	4.1
Mouse 5	Cell 8	-41.7665	GABA		5.2
Mouse 6	Cell 9	-37.8612	Mixed	2.8	3.6
Mouse 6	Cell 10	-47.197	GABA		2.9
Mouse 7	Cell 11	-54.3856	GABA		2.4
Mouse 7	Cell 12	-44.2906	GABA		2.4
Mouse 8	Cell 13	-51.9537	GABA		4.4
Mouse 9	Cell 14	-53.3175	GABA		4.6
Mouse 9	Cell 15	-46.5012	GABA		2.4
Mouse 9	Cell 16	-38.1427	Mixed	2.6	3
Mouse 10	Cell 17	-27.14	Mixed	4.8	5.1
Mouse 10	Cell 18	-43.5814	GABA		2.6
Mouse 10	Cell 19	-43.6594	GABA		2.8
Mouse 11	Cell 20	-41.0889	GABA		2.2
Mouse 11	Cell 21	-40.1141	GABA		2.2
Mouse 11	Cell 22	-50.5846	GABA		3.4
Mouse 11	Cell 23	-51.1037	GABA		2.1
