# Supplementary material for: Midbrain dopaminergic inputs gate amygdala intercalated cell clusters by distinct and cooperative mechanisms in male mice
Source: eLife. 2021 May 24;10:e63708. doi: 10.7554/eLife.63708 (PMC8143799; doi:10.7554/eLife.63708)
Supplement: Figure 2—source data 3. [file elife-63708-fig2-data3.xlsx]

## Sheet: Sheet1
Source Data for Figure 2C, Figure 2-figure supplement 2B-C
Animal ID	Cell ID (CeA)	Erev (mV)	Corelease type	Latency (ms) -70mV	Latency (ms) 0mV
Mouse 1	Cell 1	-8.70192	Glu	3.2
Mouse 1	Cell 2	2.73892	Glu	3.2
Mouse 2	Cell 3	-31.7575	Mixed	3	3
Mouse 2	Cell 4	-5.98337	Glu	4
Mouse 3	Cell 5	-53.7626	GABA		3.4
Mouse 3	Cell 6	-1.08903	Glu	4
Mouse 3	Cell 7	-2.3111	Glu	3
Mouse 4	Cell 8	-39.871	Mixed	3.4	3.8
Mouse 4	Cell 9	2.99573	Glu	2.4
Mouse 4	Cell 10	-12.4059	Glu	2.2
Mouse 5	Cell 11	-20.679	Mixed	2.6	4.4
Mouse 6	Cell 12	0.0411505	Glu	3
Mouse 7	Cell 13	-36.1546	Mixed	3.8	1
Mouse 8	Cell 14	-35.2879	Mixed	2.8	3
Mouse 9	Cell 15	-50.3604	GABA		3.8
Mouse 10	Cell 16	-3.51799	Glu	3.6
Mouse 10	Cell 17	-41.6093	GABA		2
Mouse 11	Cell 18	-1.53251	Glu	2.8
