# Supplementary material for: Midbrain dopaminergic inputs gate amygdala intercalated cell clusters by distinct and cooperative mechanisms in male mice
Source: eLife. 2021 May 24;10:e63708. doi: 10.7554/eLife.63708 (PMC8143799; doi:10.7554/eLife.63708)
Supplement: Figure 3—source data 1. [file elife-63708-fig3-data1.xlsx]

## Sheet: Sheet1
Source Data for Figure 3
Figure 3B-C
young animals, membrane potentials (mV) in dm-ITCs
		y_Bsl	y_DA	y_Wash		z-score
Mouse 1	Cell 1	-61.7495	-64.4218	-59.3347		-5.03315
Mouse 1	Cell 2	-51.5415	-55.3129	-48.0356		-13.8055
Mouse 1	Cell 3	-70.4051	-73.4121	-71.4696		-17.2628
Mouse 2	Cell 4	-72.7301	-74.45	-71.9031		-3.59107
Mouse 3	Cell 5	-76.0546	-78.1165	-77.0794		-4.58261
Mouse 3	Cell 6	-71.7593	-74.8673	-72.8698		-10.1502
Mouse 4	Cell 7	-68.5305	-75.2272	-72.3004		-36.5025
Mouse 4	Cell 8	-72.0429	-74.8615	-69.164		-16.9097
Mouse 5	Cell 9	-74.1803	-76.9123	-74.7395		-5.43276
Figure 3E-F
adult animals membrane potentials (mV) in dm-ITCs
		a_Bsl	a_DA	a_Wash		z-score
Mouse 1	Cell 1	-49.4215	-59.9454	-55.412		-5.33481
Mouse 1	Cell 2	-69.1576	-72.3147	-72.3563		-4.94899
Mouse 2	Cell 3	-74.4074	-75.8234	-75.5751		-3.8692
Mouse 3	Cell 4	-76.1922	-78.299	-75.4974		-3.30624
Mouse 3	Cell 5	-73.0853	-74.5735	-72.5145		-9.81849
Mouse 4	Cell 6	-74.5601	-75.9163	-75.4882		-5.86264
Mouse 4	Cell 7	-66.7755	-70.4746	-65.2704		-29.4847
Mouse 5	Cell 8	-64.2563	-65.9349	-65.4919		-4.84528
Mouse 6	Cell 9	-70.8695	-72.0306	-70.8868		-5.08915
Mouse 7	Cell 10	-63.9432	-68.4458	-67.3181		-18.595
Mouse 8	Cell 11	-68.4118	-69.611	-64.3225		-5.56
Figure 3H-I, Figure 3-figure supplement 1
30 Hz stimulation membrane potentials (mV) in dm-ITCs
		Bsl	30 Hz	Recovery		z-score
Mouse 1	Cell 1	-61.9318	-67.0049	-64.9551		-5.36558	+CGP
Mouse 1	Cell 2	-64.1035	-66.2136	-63.1416		-3.80611	+CGP
Mouse 1	Cell 3	-62.7751	-63.8685	-62.6149		-5.20036	+CGP
Mouse 1	Cell 4	-56.7724	-61.1556	-58.481		-9.80905	+CGP
Mouse 1	Cell 5	-57.2791	-59.2424	-57.9416		-8.56679	+CGP
Mouse 1	Cell 6	-65.8539	-68.0667	-65.6658		-19.7053
Mouse 2	Cell 7	-63.9181	-66.2513	-64.7622		-21.5766
Mouse 2	Cell 8	-62.7244	-65.0558	-63.7898		-12.0818
Mouse 2	Cell 9	-63.1033	-66.264	-64.4865		-14.9224
Mouse 2	Cell 10	-62.036	-65.2684	-62.64		-9.82561
Mouse 2	Cell 11	-61.9781	-65.3216	-63.2526		-13.0433
