# Supplementary material for: Midbrain dopaminergic inputs gate amygdala intercalated cell clusters by distinct and cooperative mechanisms in male mice
Source: eLife. 2021 May 24;10:e63708. doi: 10.7554/eLife.63708 (PMC8143799; doi:10.7554/eLife.63708)
Supplement: Figure 4—figure supplement 2—source data 1. [file elife-63708-fig4-figsupp2-data1.xlsx]

## Sheet: Sheet1
Source Data for Figure 4-figure supplement 2A,B
Data for sEPSCs in dm-ITCs (30 Hz stimulation)
		Frequency (Hz)		Amplitude (pA)
Animal ID		Bsl	Stim	Bsl	Stim
Mouse 1	cell 1	1.93333	2.1	7.50023	7.78537
Mouse 2	cell 2	0.816667	1.15	7.59947	9.45954
Mouse 3	cell 3	3.86667	3.36667	14.5401	14.1541
Mouse 4	cell 4	2.61667	2.06667	10.4667	8.88606
Mouse 5	cell 5	2.45	2.66667	12.4657	12.4497
Mouse 5	cell 6	2.73333	2.76667	11.5403	12.1344
Mouse 6	cell 7	1.4	1.98333	14.1376	14.6397
Mouse 6	cell 8	4.71667	3.86667	8.74321	10.0879
Mouse 7	cell 9	3.31667	3.43333	13.6409	15.4914
