# Supplementary material for: Midbrain dopaminergic inputs gate amygdala intercalated cell clusters by distinct and cooperative mechanisms in male mice
Source: eLife. 2021 May 24;10:e63708. doi: 10.7554/eLife.63708 (PMC8143799; doi:10.7554/eLife.63708)
Supplement: Figure 4—figure supplement 3—source data 1. [file elife-63708-fig4-figsupp3-data1.xlsx]

## Sheet: Sheet1
Source Data for Figure 4-figure supplement 3A,B
Data for sIPSCs in vm-ITCs (30 Hz stimulation)
		Frequency (Hz)		Amplitude (pA)
Animal ID		Bsl	Stim	Bsl	Stim
Mouse 1	cell 1	0.75	0.833333	15.351	10.9613
Mouse 1	cell 2	1.51667	1.98333	24.8893	18.6773
Mouse 1	cell 3	0.533333	0.766667	14.6303	13.5452
Mouse 2	cell 4	1.51667	1.93333	34.4671	31.451
Mouse 3	cell 5	1.33333	1.45	20.6436	19.9125
Mouse 3	cell 6	1.66667	1.85	13.7461	13.7956
Mouse 3	cell 7	1.7	0.95	18.7587	17.9968
Mouse 4	cell 8	1.35	1.23333	14.2231	11.9819
Mouse 5	cell 9	0.466667	0.65	14.8403	16.7925
Mouse 6	cell 10	0.6	1.15	13.4819	11.7138
