# Supplementary material for: Midbrain dopaminergic inputs gate amygdala intercalated cell clusters by distinct and cooperative mechanisms in male mice
Source: eLife. 2021 May 24;10:e63708. doi: 10.7554/eLife.63708 (PMC8143799; doi:10.7554/eLife.63708)
Supplement: Figure 4—source data 1. [file elife-63708-fig4-data1.xlsx]

## Sheet: Sheet1
Source Data for Figure 4
Data for sIPSCs in dm-ITCs (30 Hz stimulation) Figure 4A, B
		Frequency (Hz)		Amplitude (pA)
Animal ID		Bsl	Stim	Bsl	Stim
Mouse 1	cell 1	1.25	1.31667	16.7578	18.7146
Mouse 1	cell 2	0.566667	0.533333	21.7338	16.3212
Mouse 1	cell 3	1.1	1.15	25.4854	21.8736
Mouse 2	cell 4	1.66667	1.51667	17.0679	16.29
Mouse 3	cell 5	0.966667	0.866667	16.1123	13.2986
Mouse 3	cell 6	1.61667	4.95	20.7825	17.9548
Mouse 4	cell 7	0.966667	1.05	19.9159	14.6858
Mouse 4	cell 8	0.166667	0.283333	22.7173	16.3251
Mouse 5	cell 9	0.8	0.8	12.6044	12.7061
Mouse 6	cell 10	0.6	0.6	15.2402	16.2371
Mouse 7	cell 11	0.466667	0.85	15.0789	11.5105
Mouse 7	cell 12	0.933333	0.916667	14.2103	12.7724
Mouse 7	cell 13	1.06667	1.11667	15.522	15.9484
Data for sIPSCs in dm-ITCs (30 Hz stimulation+ DA-R block) Figure 4C, D
		Frequency (Hz)		Amplitude (pA)
Animal ID		Bsl	Stim	Bsl	Stim
Mouse 1	cell 1	0.866667	0.833333	12.8027	10.5494
Mouse 1	cell 2	0.366667	0.516667	11.4774	10.8101
Mouse 1	cell 3	0.65	0.516667	12.7055	13.2171
Mouse 2	cell 4	0.333333	0.516667	14.3205	13.2308
Mouse 2	cell 5	0.166667	0.316667	12.2406	13.0664
Mouse 2	cell 6	1.11667	1.01667	16.152	15.7231
Mouse 2	cell 7	0.25	0.35	11.7757	13.1051
Mouse 3	cell 8	0.433333	0.316667	8.22108	10.1077
Mouse 3	cell 9	0.683333	0.983333	14.1512	14.725
Mouse 3	cell 10	0.65	0.616667	9.74679	9.77303
Data for sIPSCs in dm-ITCs (1 Hz stimulation) Figure 4E, F
		Frequency (Hz)		Amplitude (pA)
Animal ID		Bsl	Stim	Bsl	Stim
Mouse 1	cell 1	1.73333	1.18333	16.7607	18.6591
Mouse 1	cell 2	0.816667	0.816667	18.3684	16.6047
Mouse 2	cell 3	0.533333	0.55	15.9663	17.9047
Mouse 3	cell 4	1.35	1.68333	11.6996	10.9301
Mouse 3	cell 5	1.21667	1.55	12.6723	10.0399
Mouse 4	cell 6	1.26667	2.7	16.7505	22.1507
Mouse 4	cell 7	0.6	0.666667	17.7214	20.4544
