# Supplementary material for: Midbrain dopaminergic inputs gate amygdala intercalated cell clusters by distinct and cooperative mechanisms in male mice
Source: eLife. 2021 May 24;10:e63708. doi: 10.7554/eLife.63708 (PMC8143799; doi:10.7554/eLife.63708)
Supplement: Figure 5—figure supplement 1—source data 1. [file elife-63708-fig5-figsupp1-data1.xlsx]

## Sheet: Sheet1
Source Data for Figure 5-figure supplement 1C
pathway	Animal ID	Cell ID	Latency (ms)
dm-ITC to vm-ITC	Mouse 1	Cell 1	2
	Mouse 1	Cell 2	2.2
	Mouse 1	Cell 3	2
	Mouse 2	Cell 4	2
	Mouse 2	Cell 5	1.8
	Mouse 3	Cell 6	1.4
	Mouse 4	Cell 7	1.8
	Mouse 4	Cell 8	2.2
	Mouse 5	Cell 9	2.8
	Mouse 5	Cell 10	2.2
	Mouse 6	Cell 11	2.6
	Mouse 7	Cell 12	2.6
	Mouse 8	Cell 13	2.4
	Mouse 8	Cell 14	2.6
	Mouse 8	Cell 15	2.4
	Mouse 9	Cell 16	3
	Mouse 10	Cell 17	2.2
	Mouse 10	Cell 18	2
l-ITC to dm-ITC	Mouse 1	Cell 1	2.2
	Mouse 1	Cell 2	1.6
	Mouse 2	Cell 3	1.8
	Mouse 3	Cell 4	1.6
	Mouse 3	Cell 5	1.4
	Mouse 4	Cell 6	1.8
	Mouse 5	Cell 7	2.4
	Mouse 5	Cell 8	2.4
	Mouse 6	Cell 9	1.8
	Mouse 7	Cell 10	2
	Mouse 8	Cell 11	1.8
	Mouse 8	Cell 12	1.8
	Mouse 9	Cell 13	3.2
	Mouse 9	Cell 14	2.2
	Mouse 9	Cell 15	1.6
	Mouse 10	Cell 16	3
	Mouse 10	Cell 17	3
	Mouse 11	Cell 18	1.8
	Mouse 11	Cell 19	2
	Mouse 12	Cell 20	2.4
	Mouse 12	Cell 21	2
	Mouse 12	Cell 22	1.8
