# Supplementary material for: Midbrain dopaminergic inputs gate amygdala intercalated cell clusters by distinct and cooperative mechanisms in male mice
Source: eLife. 2021 May 24;10:e63708. doi: 10.7554/eLife.63708 (PMC8143799; doi:10.7554/eLife.63708)
Supplement: Figure 5—figure supplement 1—source data 2. [file elife-63708-fig5-figsupp1-data2.xlsx]

## Sheet: Sheet1
Source Data for Figure 5-figure supplement 1E
Relative changes in IPSC amplitude upon dopamine application
	pathway: l-ITC to dm-ITC
	Mouse 1	Mouse 1	Mouse 2	Mouse 2	Mouse 3	Mouse 3
Time (min)	Cell 1	Cell 2	Cell 3	Cell 4	Cell 5	Cell 6
-2	100	100	100	100	100	100
-1	107.477	106.469	97.0091	101.716	100.986	95.5373
0	112.131	102.784	102.947	103.349	95.3455	83.3558
1	110.968	103.819	102.097	111.907	102.297	97.5037
2	106.571	100.216	112.702	105.624	90.6406	91.6483
3	100.675	99.6225	101.511	108.783	45.8279	56.7848
4	78.4357	76.8883	53.0414	75.727	24.5513	31.1515
5	67.8318	61.3773	41.1138	68.151	25.0092	36.6454
6	70.6467	63.8462	33.2754	70.0211	32.306	29.2841
7	69.7793	46.3519	41.4959	71.4828	19.2598	33.0187
8	66.1118	53.4597	34.2499	74.3886	31.2509	24.7371
9	65.5118	52.4987	78.9242	78.066	49.2547	62.4271
10	78.3977	67.7137	91.4551	76.9783	78.5522	84.3752
11	81.1876	71.3105	113.642	58.7381	73.8672	76.7315
12	88.6537	73.0356	106.246	72.3798	77.0107	81.9796
13	96.1327	79.6009	114.886	67.3498	75.8469	79.4435
14	96.5287	78.3215	111.693	67.2917	90.5371	80.6353
15	89.9331	74.4174	116.682	77.8409	81.5149	74.1311
16	88.853	72.3407	121.282	66.1488	81.8123	72.7691
17	90.447	71.9154	116.567	84.5878	76.9881	85.2647
