# Supplementary material for: Midbrain dopaminergic inputs gate amygdala intercalated cell clusters by distinct and cooperative mechanisms in male mice
Source: eLife. 2021 May 24;10:e63708. doi: 10.7554/eLife.63708 (PMC8143799; doi:10.7554/eLife.63708)
Supplement: Figure 5—figure supplement 1—source data 3. [file elife-63708-fig5-figsupp1-data3.xlsx]

## Sheet: Sheet1
Source Data for Figure 5-figure supplement 1F
Effect of DA-application on l-ITC to dm-ITC pathway
		IPSC Amplitude (pA)		Ampl %	IPSC PPR		PPR %
Mouse ID	Cell No	bsl	DA		bsl	DA
Mouse 1	Cell 1	195.174	134.369	68.8459	0.706121	0.786234	111.345
Mouse 1	Cell 2	196.563	107.23	54.5526	0.626799	0.830638	132.521
Mouse 2	Cell 3	337.595	122.683	36.3404	0.827157	1.54546	186.84
Mouse 2	Cell 4	182.602	131.408	71.9642	0.665649	0.8153	122.482
Mouse 3	Cell 5	190.332	52.5423	27.6056	0.503741	1.06425	211.269
Mouse 3	Cell 6	175.701	50.9767	29.0133	0.540707	1.24284	229.855
