# Supplementary material for: Midbrain dopaminergic inputs gate amygdala intercalated cell clusters by distinct and cooperative mechanisms in male mice
Source: eLife. 2021 May 24;10:e63708. doi: 10.7554/eLife.63708 (PMC8143799; doi:10.7554/eLife.63708)
Supplement: Figure 5—source data 1. [file elife-63708-fig5-data1.xlsx]

## Sheet: Sheet1
Source Data for Figure 5B
Relative changes in IPSC amplitude upon dopamine application
	pathway: dm-ITC to vm-ITC
	Mouse 1	Mouse 1	Mouse 1	Mouse 2	Mouse 2	Mouse 3
Time (min)	Cell 1	Cell 2	Cell 3	Cell 4	Cell 5	Cell 6
-2	100	100	100	100	100	100
-1	105.464	84.9166	90.448	103.152	95.5217	110.117
0	104.016	103.518	97.317	99.6184	108.72	109.5
1	109.913	112.345	86.0071	103.524	95.3835	104.981
2	106.845	91.5198	89.6275	93.0207	95.7954	105.053
3	75.9132	39.3012	65.1472	63.0841	48.5376	57.3654
4	67.9158	33.219	54.4633	34.0974	40.2741	23.1852
5	68.3005	21.3803	59.5424	52.7874	34.1887	34.0307
6	65.9665	28.1646	69.0603	35.8072	38.7647	23.0457
7	62.6366	27.2487	68.3152	26.509	38.5002	34.2426
8	59.8044	37.9507	56.8122	21.8547	36.1242	16.7078
9	89.8622	39.5656	70.6864	55.7286	36.4607	41.7701
10	94.7212	51.2118	71.3721	79.5178	46.4707	78.4674
11	103.816	55.2321	75.7139	79.4379	80.5508	79.3053
12	99.0064	83.6695	83.8551	95.0561	87.6565	103.415
13	98.3344	81.0075	83.9822	104.204	95.7246	101.6
14	96.8862	105.565	80.5752	108.484	89.2476	110.274
15	87.4168	97.8832	87.9905	100.635	91.9711	120.825
16	83.5797	89.3253	82.073	112.343	76.1891	116.015
17	93.3421	120.38	78.3848	105.889	89.2612	122.917
