# Supplementary material for: Midbrain dopaminergic inputs gate amygdala intercalated cell clusters by distinct and cooperative mechanisms in male mice
Source: eLife. 2021 May 24;10:e63708. doi: 10.7554/eLife.63708 (PMC8143799; doi:10.7554/eLife.63708)
Supplement: Figure 5—source data 2. [file elife-63708-fig5-data2.xlsx]

## Sheet: Sheet1
Source Data for Figure 5C
Effect of DA-application on dm-ITC to vm-ITC pathway
		IPSC Amplitude (pA)		Ampl %	IPSC PPR		PPR %
Mouse ID	Cell No	bsl	DA		bsl	DA
Mouse 1	Cell 1	247.48	155.424	62.8025	0.620738	0.817505	131.699
Mouse 1	Cell 2	75.1224	23.3791	31.1213	0.663986	1.06177	159.909
Mouse 1	Cell 3	156.501	101.302	64.7292	0.551288	0.838827	152.158
Mouse 2	Cell 4	183.945	51.6094	28.057	0.72203	2.06203	285.588
Mouse 2	Cell 5	117.276	44.3261	37.7964	0.834614	1.0869	130.228
Mouse 3	Cell 6	52.0983	12.8502	24.6653	0.856894	1.8886	220.401
