# Supplementary material for: Midbrain dopaminergic inputs gate amygdala intercalated cell clusters by distinct and cooperative mechanisms in male mice
Source: eLife. 2021 May 24;10:e63708. doi: 10.7554/eLife.63708 (PMC8143799; doi:10.7554/eLife.63708)
Supplement: Figure 5—source data 3. [file elife-63708-fig5-data3.xlsx]

## Sheet: Sheet1
Source Data for Figure 5E-F
Effect of DA-R agonist application on dm-ITC to vm-ITC pathway
			IPSC Amplitude (pA)		Ampl %	PPR		PPR %
agonist	Mouse ID	Cell No	bsl	agonist		bsl	agonist
DH	Mouse 1	Cell 1	112.079	51.1587	45.6452	0.642708	0.776916	120.882
	Mouse 1	Cell 2	97.6415	24.771	25.3693	0.957906	2.30887	241.033
	Mouse 2	Cell 3	230.361	164.16	71.2621	0.667193	0.996835	149.407
	Mouse 2	Cell 4	275.862	124.685	45.1982	0.900311	1.52103	168.945
	Mouse 3	Cell 5	185	45.8546	24.7863	0.859504	2.35833	274.383
	Mouse 4	Cell 6	52.0827	35.3663	67.9042	0.654684	0.874554	133.584
Quinp	Mouse 1	Cell 1	67.6729	79.3266	117.221	0.696517	1.03627	148.779
	Mouse 1	Cell 2	210.313	185.562	88.2314	0.75405	0.671465	89.0478
	Mouse 1	Cell 3	129.826	103.47	79.6989	0.442471	0.687231	155.317
	Mouse 2	Cell 4	151.236	149.188	98.6458	0.907545	0.847718	93.4079
	Mouse 3	Cell 5	127.939	130.056	101.654	0.569054	0.727914	127.917
	Mouse 3	Cell 6	115.447	121.503	105.245	0.49725	0.643291	129.37
