# Supplementary material for: Midbrain dopaminergic inputs gate amygdala intercalated cell clusters by distinct and cooperative mechanisms in male mice
Source: eLife. 2021 May 24;10:e63708. doi: 10.7554/eLife.63708 (PMC8143799; doi:10.7554/eLife.63708)
Supplement: Figure 5—source data 4. [file elife-63708-fig5-data4.xlsx]

## Sheet: Sheet1
Source Data for Figure 5H-I
Effect of DA-R agonist application on l-ITC to dm-ITC pathway
			IPSC Amplitude (pA)		Ampl %	PPR		PPR %
agonist	Mouse ID	Cell No	bsl	agonist		bsl	agonist
DH	Mouse 1	Cell 1	217.316	99.7863	45.9176	0.669113	1.03126	154.123
	Mouse 1	Cell 2	83.4867	40.4272	48.4235	0.41472	0.809776	195.258
	Mouse 2	Cell 3	365.708	267.471	73.1378	0.627809	0.747807	119.114
	Mouse 3	Cell 4	317.524	122.625	38.6191	0.752603	0.868719	115.429
	Mouse 4	Cell 5	289.204	92.5228	31.9922	0.689301	1.04963	152.274
	Mouse 4	Cell 6	291.255	126.038	43.2742	0.508964	0.931028	182.926
	Mouse 5	Cell 7	293.01	133.407	45.53	0.293346	0.801768	273.318
	Mouse 5	Cell 8	88.8766	14.5106	16.3267	0.736853	1.12816	153.105
	Mouse 5	Cell 9	239.717	196.47	81.9593	0.947958	0.763682	80.5608
Quinp	Mouse 1	Cell 1	313.093	287.34	91.7745	1.53525	1.641	106.888
	Mouse 1	Cell 2	316.915	281.609	88.8596	0.995761	1.26829	127.369
	Mouse 2	Cell 3	206.859	196.141	94.8187	0.682128	0.68909	101.021
	Mouse 2	Cell 4	186.086	187.687	100.861	0.628194	0.633348	100.82
	Mouse 3	Cell 5	295.176	268.117	90.8328	0.794779	0.837127	105.328
	Mouse 3	Cell 6	190.09	173.665	91.3595	0.886684	0.979994	110.523
	Mouse 3	Cell 7	148.214	130.66	88.1565	1.10046	0.915631	83.2044
