# Supplementary material for: Midbrain dopaminergic inputs gate amygdala intercalated cell clusters by distinct and cooperative mechanisms in male mice
Source: eLife. 2021 May 24;10:e63708. doi: 10.7554/eLife.63708 (PMC8143799; doi:10.7554/eLife.63708)
Supplement: Figure 6—figure supplement 1—source data 1. [file elife-63708-fig6-figsupp1-data1.xlsx]

## Sheet: Sheet1
Source Data for Figure 6-figure supplement 1B
Behavior Group		day1		day2
		% Freezing
		baseline	CS4-5	Baseline	CS1-4	CS5-8	CS9-12	CS13-16
CS-only	Mouse 1	0	0	25.4167	32	4.41667	15.3333	17.8333
	Mouse 2	0	12.1667	42.75	25.1667	12.9167	6.16667	0
	Mouse 3	0	0	0	3.25	3.33333	3.75	0
	Mouse 4	0	3.33333	0	0	0	0	2
E-Ext	Mouse 1	0	79	0	66.75	66.9167	69.5	50.75
	Mouse 2	5	64	46.8333	66.5833	75.5833	81.1667	49.8333
	Mouse 3	3.66667	56.6667	43.25	63.9167	54.9167	63.25	61.25
	Mouse 4	0	50.8333	20.9167	49.75	67.1667	42	48.5833
	Mouse 5	1.83333	55.5	30.4167	64.5	66.1667	71.25	72.0833
	Mouse 6	0	40	9.66667	12.0833	63.5	52.1667	51
