# Supplementary material for: Midbrain dopaminergic inputs gate amygdala intercalated cell clusters by distinct and cooperative mechanisms in male mice
Source: eLife. 2021 May 24;10:e63708. doi: 10.7554/eLife.63708 (PMC8143799; doi:10.7554/eLife.63708)
Supplement: Figure 6—figure supplement 2—source data 1. [file elife-63708-fig6-figsupp2-data1.xlsx]

## Sheet: Sheet1
Source Data for Figure 6-figure supplement 2
Behavior Group		day1		day2							day3		day4
		% Freezing
		baseline	CS4-5	baseline	CS1-4	CS5-8	CS9-12	CS13-16	CS17-20	CS21-25	baseline	CS21-25	baseline	CS1-4
Long Extinction protocol	Mouse 1	3.66667	45.3333	2.33333	44.9167	55.0833	51.5	45.0833	35.9167	57.4	15.4167	62.6	0	17.3333
	Mouse 2	0	48.6667	0	57.6667	52.5	59.75	54.4167	44.1667	31.0667	21	22.8667	10.5	35.4167
	Mouse 3	0	57.3333	16.3333	72.9167	67.6667	54.6667	58.1667	67	43.7333	0.333333	38.8667	25.5	53.8333
	Mouse 4	0	34.5	3.58333	51.8333	62.4167	51.6667	58.8333	54.75	61	5.83333	45.7333	47.9167	43.0833
	Mouse 5	0	31	4.66667	44.3333	41.4167	17.25	11.6667	17.8333	25.6	10	15.2	7	11.75
	Mouse 6	0	31.3333	0	19.5	26.4167	11	7.75	8.5	6.53333	7.75	12.8667	33.75	47
	Mouse 7	0	12.3333	0	46.0833	46	34	31.5	30.8333	29.3333	8.5	23.8	6.75	11.75
	Mouse 8	0	39	2.5	54.9167	51.5	48.3333	38.8333	51.75	35.7333	13.1667	14.5333	10.1667	2.33333
	Mouse 9	0	62.8333	14.5	66.0833	65.6667	28.0833	20.1667	16.9167	18.7333	24.5	41.1333	28.0833	26.4167
	Mouse 10	1.83333	65.5	13.25	71.5833	79.8333	66	67	45.8333	49.8	9	21.4	24.25	24.0833
