# Supplementary material for: Midbrain dopaminergic inputs gate amygdala intercalated cell clusters by distinct and cooperative mechanisms in male mice
Source: eLife. 2021 May 24;10:e63708. doi: 10.7554/eLife.63708 (PMC8143799; doi:10.7554/eLife.63708)
Supplement: Figure 6—figure supplement 3—source data 1. [file elife-63708-fig6-figsupp3-data1.xlsx]

## Sheet: Sheet1
Source Data for Figure 6-figure supplement 3B
Behavior Group		day1		day2
		% Freezing
		baseline	CS4-5	baseline	CS1-4	CS5-8	CS9-12	CS13-16
CS-only	Mouse 1	0	3.33333	14.0833	14.1667	4.16667	12.1667	13.25
	Mouse 2	0	0	2.91667	2.83333	4.08333	5.16667	0
	Mouse 3	3.66667	4.5	1.91667	2	9.33333	6.66667	8.08333
	Mouse 4	3.16667	0	8.75	11.4167	9.41667	20.75	19.5833
E-Ext	Mouse 1	0	86.5	27.1667	49	72.3333	69.0833	71.0833
	Mouse 2	0	47.3333	13.75	77	80.6667	64.25	81.25
	Mouse 3	0	27.1667	0	30.25	36.0833	31.1667	26.0833
	Mouse 4	0	33.3333	36.75	57.9167	61.1667	71.5833	76.6667
	Mouse 5	0	54.3333	12.5	82.9167	72.4167	59.25	78.3333
	Mouse 6	0	59.3333	35.25	72.6667	48.3333	70.6667	73.3333
