# Supplementary material for: Midbrain dopaminergic inputs gate amygdala intercalated cell clusters by distinct and cooperative mechanisms in male mice
Source: eLife. 2021 May 24;10:e63708. doi: 10.7554/eLife.63708 (PMC8143799; doi:10.7554/eLife.63708)
Supplement: Figure 6—source data 1. [file elife-63708-fig6-data1.xlsx]

## Sheet: Sheet1
Source Data for Figure 6C, D
Properties of fast PSCs in dm-ITCs
Behavior	Mouse ID	Cell No	Erev	Response type
CS-only	Mouse 1	Cell 1	-37.3986	Mixed
	Mouse 2	Cell 2	-30.6048	Mixed
	Mouse 2	Cell 3	-52.8495	GABA
	Mouse 3	Cell 4	-49.1462	GABA
	Mouse 3	Cell 5	4.76376	Glu
	Mouse 3	Cell 6	-23.0457	Mixed
	Mouse 3	Cell 7	-33.1711	Mixed
	Mouse 3	Cell 8	-43.7308	GABA
	Mouse 4	Cell 9	-38.5307	Mixed
	Mouse 4	Cell 10	-36.8954	Mixed
E-Ext	Mouse 1	Cell 1	-48.9126	GABA
	Mouse 1	Cell 2	-49	GABA
	Mouse 2	Cell 3	-50.3619	GABA
	Mouse 3	Cell 4	-44.9759	GABA
	Mouse 4	Cell 5	-50.1536	GABA
	Mouse 4	Cell 6	-47.4406	GABA
	Mouse 5	Cell 7	-45.2133	GABA
	Mouse 6	Cell 8	-31.1271	Mixed
	Mouse 6	Cell 9	-48.2268	GABA
	Mouse 6	Cell 10	-39.9196	Mixed
	Mouse 6	Cell 11	-40.6328	GABA
