# Supplementary material for: Midbrain dopaminergic inputs gate amygdala intercalated cell clusters by distinct and cooperative mechanisms in male mice
Source: eLife. 2021 May 24;10:e63708. doi: 10.7554/eLife.63708 (PMC8143799; doi:10.7554/eLife.63708)
Supplement: Figure 6—source data 2. [file elife-63708-fig6-data2.xlsx]

## Sheet: Sheet1
Source Data for Figure 6F
Relative changes in IPSC amplitude in dm-ITC to vm-ITC pathway
Behavior		Mouse 1	Mouse 1	Mouse 2	Mouse 3	Mouse 4	Mouse 4	Mouse 5	Mouse 5	Mouse 6	Mouse 6	Mouse 6
	Time (min)	Cell 1	Cell 2	Cell 3	Cell 4	Cell 5	Cell 6	Cell 7	Cell 8	Cell 9	Cell 10	Cell 11
E-Ext	-2	100	100	100	100	100	100	100	100	100	100	100
	-1	89.5187	103.953	100.595	98.4605	95.2273	105.853	108.031	93.8465	111.478	97.6393	129.873
	0	93.5773	98.4938	95.4564	115.269	92.9674	101.164	102.753	92.4131	109.875	103.954	116.765
	1	100.834	93.1652	100.367	112.563	97.4353	99.6123	106.007	94.6895	116.888	106.292	116.977
	2	96.3911	100.918	76.1276	81.6574	90.8165	92.109	117.145	72.306	91.5188	73.8109	90.7208
	3	77.559	52.1751	26.6771	27.8273	33.3635	56.9409	101.084	33.108	53.1093	46.4533	59.7082
	4	20.301	27.35	15.6316	25.4077	33.9784	44.9137	44.1279	38.6563	27.401	20.5358	60.1869
	5	34.5674	20.7878	23.4604	26.6947	34.4055	31.384	38.7571	32.5859	33.352	26.0641	52.7815
	6	37.286	26.6528	20.6935	29.9485	48.6909	50.4649	24.6254	40.0309	34.7865	37.0735	74.4648
	7	36.0883	10.3513	16.6938	22.4818	54.5062	30.231	34.4999	35.1858	21.213	38.7807	72.4757
	8	39.2595	14.0284	27.9873	47.8224	45.1526	28.9875	24.1065	42.9905	38.005	42.8725	55.9065
	9	39.2233	13.2799	60.9264	50.5124	60.3801	34.9141	32.9667	52.7802	62.47	47.6261	80.2212
	10	64.5561	29.919	82.0039	49.1173	77.2212	50.9326	80.8552	31.6578	78.5327	54.6279	86.6712
	11	67.8706	37.9595	85.6792	69.4354	90.1998	71.1217	85.6534	33.3882	78.8186	62.3247	111.714
	12	62.4426	53.8073	78.4413	85.4489	100.158	74.2436	95.1568	60.3297	92.6861	83.9951	122.64
	13	100.542	60.7353	85.4131	89.3169	99.7172	75.9198	92.0474	76.9798	89.9044	82.9289	125.96
	14	107.428	68.2779	88.8268	107.693	93.0823	73.3828	102.166	81.5553	90.4586	88.2866	123.287
	15	109.094	60.2446	91.9663	94.3488	104.299	82.3671	118.962	90.4433	93.5164	95.0792	119.614
	16	99.4212	68.323	98.911	90.3796	102.667	74.7225	99.8907	102.934	82.6697	84.1506	129.879
Behavior		Mouse 1	Mouse 2	Mouse 3	Mouse 3	Mouse 4	Mouse 4	Mouse 4
	Time (min)	Cell 1	Cell 2	Cell 3	Cell 4	Cell 5	Cell 6	Cell 7
CS-only	-2	100	100	100	100	100	100	100
	-1	86.2364	127.828	98.7855	103.358	98.6256	105.626	90.6472
	0	95.1206	116.52	107.139	103.74	94.1044	107.433	96.8696
	1	100.629	117.438	92.0224	110.724	99.581	101.504	107.722
	2	74.5535	80.664	104.569	110.097	93.8917	86.6589	99.1422
	3	23.4824	61.0439	93.4368	72.1619	72.0985	60.6728	93.9545
	4	23.607	32.5285	51.2516	68.0863	49.5276	67.2229	48.1291
	5	21.2967	36.2848	36.9118	56.4362	55.4973	69.129	34.4029
	6	12.8366	31.2859	36.7541	72.9548	51.2249	46.7965	35.2552
	7	11.2025	15.7534	34.7544	54.6425	61.8321	69.667	41.0104
	8	14.929	21.5004	37.7015	61.9789	64.8815	64.3109	33.8902
	9	36.9786	47.8018	33.786	61.9737	91.2597	90.6507	22.0254
	10	66.7752	62.5107	49.7479	77.3871	98.1834	102.444	32.7384
	11	75.6681	78.5658	52.527	89.5756	108.537	107.855	41.5154
	12	74.9893	73.9705	59.2387	91.6324	109.226	104.246	37.5603
	13	83.6166	74.6513	80.3993	106.38	99.5036	96.2914	44.6285
	14	81.8925	101.246	74.9712	113.522	110.931	98.3138	45.673
	15	86.1068	98.3824	107.951	104.756	108.32	95.6164	60.9269
	16	87.2923	113.164	91.4058	106.619	109.003	95.9654	71.1145
