# Supplementary material for: Midbrain dopaminergic inputs gate amygdala intercalated cell clusters by distinct and cooperative mechanisms in male mice
Source: eLife. 2021 May 24;10:e63708. doi: 10.7554/eLife.63708 (PMC8143799; doi:10.7554/eLife.63708)
Supplement: Figure 6—source data 3. [file elife-63708-fig6-data3.xlsx]

## Sheet: Sheet1
Source Data for Figure 6G
Effect of DA application on dm-ITC to vm-ITC pathway
			IPSC Amplitude (pA)		Ampl %	PPR		PPR %
Behavior	Mouse ID	Cell No	bsl	DA		bsl	DA
E-Ext	Mouse 1	Cell 1	63.0579	17.2995	27.4342	0.918913	4.70577	512.102
	Mouse 1	Cell 2	56.4202	13.5797	24.0689	0.466869	1.55625	333.338
	Mouse 2	Cell 3	112.949	22.077	19.546	0.720122	3.60179	500.163
	Mouse 3	Cell 4	61.0017	15.8916	26.0512	0.773979	3.465	447.686
	Mouse 4	Cell 5	167.976	57.4343	34.1919	0.471046	2.01903	428.627
	Mouse 4	Cell 6	132.848	50.6799	38.1488	0.473389	1.01747	214.933
	Mouse 5	Cell 7	240.587	99.7053	41.4425	0.63198	1.50385	237.958
	Mouse 5	Cell 8	103.733	36.9508	35.6211	0.409841	0.993881	242.504
	Mouse 6	Cell 9	142.715	43.3518	30.3765	0.605131	1.10971	183.384
	Mouse 6	Cell 10	227.056	52.904	23.3	0.899926	2.00862	223.198
	Mouse 6	Cell 11	106.277	60.0297	56.4842	1.0703	0.996143	93.0714
CS-only	Mouse 1	Cell 1	104.009	23.352	22.4519	0.599168	0.961077	160.402
	Mouse 2	Cell 2	70.1038	24.1204	34.4067	0.812342	0.660643	81.3257
	Mouse 3	Cell 3	272.138	119.963	44.0817	0.683844	1.13546	166.041
	Mouse 3	Cell 4	365.384	235.262	64.3875	0.682234	0.8003	117.306
	Mouse 4	Cell 5	142.021	74.5787	52.5124	0.626426	1.29178	206.214
	Mouse 4	Cell 6	126.084	85.959	68.1759	0.716827	0.887914	123.867
	Mouse 4	Cell 7	155.985	64.3688	41.266	0.849428	1.04151	122.613
